# Supplementary material for: Patterns of Population Differentiation and Natural Selection on the Celiac Disease Background Risk Network
Source: PLoS One. 2013 Jul 31;8(7):e70564. doi: 10.1371/journal.pone.0070564 (PMC3729812; doi:10.1371/journal.pone.0070564)
Supplement: Table S1 — FST test results. This table includes results for all loci included in each FST analysis. Loci are reported with positions from human genome build hg19 and are aligned with corresponding loci (hg18) from Trynka et al. 2011. (XLSX) [file pone.0070564.s001.xlsx]

## Sheet: Sheet1
Table S1: Significance results.
Regions from Trynka et al. 2011 Table 2: Positions of highly correlated CD variants (hg18).				Results from this study.			Africa (LWK x YRI)				East Asia (CHB x CHS)				Europe (CEU x TSI)				Africa (LWK,YRI) x East Asia (CHB,CHS,JPT)				Africa (LWK,YRI) x Europe (CEU,FIN,GBR,IBS,TSI)				East Asia (CHB,CHS,JPT) x Europe (CEU,FIN,GBR,IBS,TSI)
Chr.	hg18 Start	hg18 Stop	Nearby Protein Coding Genes	Chr.	hg19 Start	hg19 End	# SNPs	# > 99%	Ratio	P-Value	# SNPs	# > 99%	Ratio	P-Value	# SNPs	# > 99%	Ratio	P-Value	# SNPs	# > 99%	Ratio	P-Value	# SNPs	# > 99%	Ratio	P-Value	# SNPs	# > 99%	Ratio	P-Value
chr1	2510162	2710035	C1orf93,MMEL1,TTC34	Partial Coordinate Liftover Failure
chr1	25162321	25177139	0-10 kb 5' and first exon of RUNX3	1	25272143	25322143	424	1	0.00235849	0.528455	223	0	0	1	288	0	0	1	567	2	0.00352734	0.415727	568	8	0.0140845	0.132545	421	0	0	1
chr1	170940206	170948695	35-43 kb 5' of FASLG	1	172652828	172702828	336	29	0.0863095	0.0111818	184	0	0	1	179	0	0	1	507	23	0.0453649	0.0506364	472	3	0.00635593	0.238455	346	12	0.0346821	0.0618182
chr1	171129607	171131275	Intergenic region between FASLG and TNFSF18	1	172838818	172888818	320	6	0.01875	0.157818	187	0	0	1	184	0	0	1	451	40	0.0886918	0.0105455	445	5	0.011236	0.159727	325	65	0.2	0.000909091
chr1	190779182	single	32 kb 5' RGS1	1	192487559	192537559	318	10	0.0314465	0.0835455	154	0	0	1	192	0	0	1	431	0	0	1	457	0	0	1	319	0	0	1
chr1	190786488	190811722	0-24 kb 5' of and the first exon of RGS1	1	192507482	192557482	390	2	0.00512821	0.389727	193	0	0	1	236	0	0	1	526	3	0.00570342	0.351364	524	6	0.0114504	0.157727	375	0	0	1
chr1	199148015	single	Ninth intron of c1orf106	1	200856392	200906392	345	5	0.0144928	0.202091	217	1	0.00460829	0.271818	247	0	0	1	502	1	0.00199203	0.478727	494	1	0.00202429	0.387	374	2	0.00534759	0.193455
chr2	61040333	61058360	Exons 5-11 of PUS10	2	61170843	61220843	237	6	0.0253165	0.110273	119	2	0.0168067	0.111545	143	0	0	1	371	12	0.032345	0.0902727	381	4	0.0104987	0.169727	258	9	0.0348837	0.0615455
chr2	68493221	68499064	Intergenic region between PLEK and FBXO48	2	68617639	68667639	550	61	0.110909	0.00636364	343	0	0	1	323	0	0	1	707	16	0.0226308	0.139727	707	3	0.00424328	0.293273	491	0	0	1
chr2	102338297	102459513	IL18R1 and IL18RAP	2	102957473	103007473	425	12	0.0282353	0.0980909	296	0	0	1	316	0	0	1	565	72	0.127434	0.00345455	571	0	0	1	450	0	0	1
				2	103007473	103057473	382	0	0	1	248	0	0	1	253	0	0	1	522	48	0.091954	0.00945455	525	0	0	1	401	0	0	1
				2	103057473	103107473	459	8	0.0174292	0.170545	308	0	0	1	321	0	0	1	625	7	0.0112	0.248364	638	0	0	1	498	1	0.00200803	0.281091
chr2	181708291	181803246	Intergenic region between UBE2E3 and ITGA4	2	181972524	182022524	326	0	0	1	216	1	0.00462963	0.270909	212	0	0	1	480	0	0	1	479	0	0	1	367	0	0	1
				2	182022524	182072524	335	0	0	1	213	0	0	1	231	0	0	1	495	0	0	1	511	0	0	1	373	0	0	1
				2	182072524	182122524	256	0	0	1	162	0	0	1	161	0	0	1	424	1	0.00235849	0.458818	427	0	0	1	309	0	0	1
chr2	191621279	191643278	Exons 6-14 of STAT4	2	191899034	191949034	304	2	0.00657895	0.344727	155	0	0	1	168	0	0	1	450	7	0.0155556	0.200364	454	19	0.0418502	0.0284545	293	0	0	1
chr2	191656882	single	Intron 3 of STAT4	2	191923637	191973637	319	2	0.00626959	0.352636	161	1	0.00621118	0.215636	163	1	0.00613497	0.197727	473	3	0.00634249	0.335909	446	13	0.029148	0.0573636	284	0	0	1
chr2	191681808	single	Intron 3 of STAT4	2	191948563	191998563	335	2	0.00597015	0.363	179	1	0.00558659	0.232091	184	1	0.00543478	0.209818	493	1	0.0020284	0.475909	467	4	0.00856531	0.198909	321	0	0	1
chr2	204158521	204168206	111-121 kb 5' of CD28	2	204430119	204480119	405	1	0.00246914	0.515455	205	1	0.00487805	0.259545	241	5	0.0207469	0.0984545	539	0	0	1	542	0	0	1	365	6	0.0164384	0.116727
chr2	204318641	204320303	Intergenic region between CD28 and CTLA4	2	204688462	204738462	330	0	0	1	140	0	0	1	184	0	0	1	449	0	0	1	453	0	0	1	334	0	0	1
chr2	204470572	204478299	Intergenic region between CTLA4 and ICOS	2	204741191	204791191	339	0	0	1	172	0	0	1	174	0	0	1	465	0	0	1	444	0	0	1	335	1	0.00298507	0.232182
chr3	33012725	33012756	Intergenic region between CCR4 and GLB1	3	33012737	33062737	446	5	0.0112108	0.249273	248	5	0.0201613	0.0987273	270	0	0	1	580	12	0.0206897	0.152727	565	2	0.00353982	0.319	383	15	0.0391645	0.0530909
chr3	46162711	46180690	38-55 kb 3' of CCR1	3	46171697	46221697	321	27	0.0841121	0.0116364	177	0	0	1	229	0	0	1	471	0	0	1	471	5	0.0106157	0.168182	343	0	0	1
chr3	46321275	46377631	Intergenic region between CCR3 and CCR2	3	46349449	46399449	419	16	0.0381862	0.0627273	237	0	0	1	273	0	0	1	607	1	0.00164745	0.523818	602	1	0.00166113	0.437091	417	0	0	1
chr3	46458634	46480319	Exons 2-13 of LTF	3	46469473	46519473	402	45	0.11194	0.00618182	252	0	0	1	277	0	0	1	552	1	0.00181159	0.500364	556	5	0.00899281	0.193182	406	0	0	1
chr3	120601187	120605968	Intron 10 of ARHGAP31	3	119095888	119145888	403	0	0	1	262	0	0	1	257	0	0	1	561	0	0	1	544	8	0.0147059	0.127545	432	0	0	1
chr3	161106253	single	Intergenic region between SCHIP1 and IL12A	3	159598529	159648529	334	20	0.0598802	0.0259091	168	0	0	1	170	0	0	1	482	4	0.00829876	0.294455	463	0	0	1	345	5	0.0144928	0.125727
chr3	161112778	161147744	Intergenic region between SCHIP1 and IL12A	3	159622566	159672566	426	33	0.0774648	0.0134545	204	0	0	1	228	0	0	1	590	0	0	1	567	0	0	1	411	0	0	1
chr3	161136316	161168494	Intergenic region between SCHIP1 and IL12A	3	159644711	159694711	440	34	0.0772727	0.0135455	221	0	0	1	272	0	0	1	589	0	0	1	591	0	0	1	440	0	0	1
chr3	189587750	189602595	Intron 2 of LPP	3	188087479	188137479	424	6	0.0141509	0.205909	194	0	0	1	204	0	0	1	583	3	0.0051458	0.366	569	14	0.0246046	0.0713636	347	0	0	1
chr4	123257527	123770564	Multiple genes (KIAA1109, ADAD1, IL2 and IL21) (combined 2 signals for this analysis)	4	123045809	123095809	344	2	0.00581395	0.367364	120	3	0.025	0.0827273	216	0	0	1	474	1	0.0021097	0.469636	500	0	0	1	324	0	0	1
				4	123095809	123145809	282	0	0	1	103	6	0.0582524	0.0359091	168	2	0.0119048	0.138091	390	1	0.0025641	0.453	395	0	0	1	275	0	0	1
				4	123145809	123195809	276	2	0.00724638	0.327818	93	3	0.0322581	0.0671818	149	2	0.0134228	0.128091	390	0	0	1	402	0	0	1	268	0	0	1
				4	123195809	123245809	256	1	0.00390625	0.438818	78	1	0.0128205	0.132636	149	0	0	1	347	0	0	1	354	0	0	1	237	0	0	1
				4	123245809	123295809	226	0	0	1	92	2	0.0217391	0.0932727	153	0	0	1	353	0	0	1	375	0	0	1	262	0	0	1
				4	123295809	123345809	309	0	0	1	128	3	0.0234375	0.0869091	175	0	0	1	439	3	0.00683371	0.324727	450	10	0.0222222	0.0800909	324	0	0	1
				4	123345809	123395809	313	0	0	1	131	4	0.0305344	0.0701818	199	2	0.0100503	0.152455	469	3	0.00639659	0.335364	469	13	0.0277186	0.0609091	330	0	0	1
				4	123395809	123445809	322	0	0	1	119	2	0.0168067	0.111545	210	1	0.0047619	0.226	459	2	0.0043573	0.388273	494	17	0.034413	0.0416364	348	0	0	1
				4	123445809	123495809	308	0	0	1	153	3	0.0196078	0.100636	184	0	0	1	478	2	0.0041841	0.392818	451	16	0.0354767	0.0388182	343	0	0	1
				4	123495809	123545809	347	0	0	1	175	1	0.00571429	0.228727	352	2	0.00568182	0.205182	488	4	0.00819672	0.296909	480	15	0.03125	0.0512727	327	0	0	1
chr6	341321	single	Intron 4 of IRF4	6	371321	421321	448	5	0.0111607	0.249727	253	0	0	1	352	2	0.00568182	0.205182	619	0	0	1	627	7	0.0111643	0.161091	499	0	0	1
chr6	353079	355417	3' UTR of IRF4	6	384248	434248	423	5	0.0118203	0.239818	234	4	0.017094	0.110727	310	2	0.00645161	0.193091	567	1	0.00176367	0.508091	586	7	0.0119454	0.152818	456	0	0	1
chr6	90866360	90875874	Intron 2 of BACH2	6	90789396	90839396	324	1	0.00308642	0.469	191	0	0	1	185	0	0	1	473	5	0.0105708	0.256818	459	1	0.00217865	0.375182	347	18	0.0518732	0.0342727
chr6	128307943	128339304	PTPRK exons 28-30 in the 3' UTR to 24kb 3'	6	128256931	128306931	366	12	0.0327869	0.079	180	0	0	1	206	0	0	1	542	0	0	1	517	0	0	1	372	7	0.0188172	0.107273
chr6	128332892	128335255	Last exon of PTPRK in the 3' UTR	6	128267381	128317381	376	10	0.0265957	0.104636	179	0	0	1	191	0	0	1	538	0	0	1	511	0	0	1	352	5	0.0142045	0.126545
chr6	138000928	138048197	Intergenic region between OLIG3 and TNFAIP3	6	137957870	138007870	443	0	0	1	302	0	0	1	311	0	0	1	637	1	0.00156986	0.534273	637	0	0	1	474	0	0	1
chr6	138015797	138043754	Intergenic region between OLIG3 and TNFAIP3	6	137963083	138013083	426	0	0	1	285	0	0	1	290	0	0	1	619	1	0.00161551	0.528091	624	0	0	1	457	0	0	1
chr6	159385965	159390046	4 kb 5' and 5' UTR of TAGAP	6	159443018	159493018	400	0	0	1	199	1	0.00502513	0.252727	241	0	0	1	535	7	0.0130841	0.225	535	0	0	1	370	9	0.0243243	0.0897273
chr6	159418255	single	32 kb 5' of TAGAP	6	159473267	159523267	417	1	0.00239808	0.523273	174	18	0.103448	0.0150909	205	0	0	1	563	5	0.00888099	0.283455	553	1	0.00180832	0.414818	352	21	0.0596591	0.0269091
chr7	37366994	37404402	Intron 1 of ELMO1	7	37394173	37444173	430	13	0.0302326	0.0877273	250	1	0.004	0.302909	258	0	0	1	580	0	0	1	588	1	0.00170068	0.431455	403	19	0.0471464	0.0402727
chr8	129333242	129345888	151-163 kb 3' of PVT1	8	129248883	129298883	540	3	0.00555556	0.376091	265	0	0	1	227	0	0	1	719	1	0.00139082	0.283455	702	1	0.0014245	0.465182	424	6	0.0141509	0.126727
chr10	6430198	single	Intergenic region between PFKFB3 and PRKCQ	10	6365192	6415192	468	12	0.025641	0.108364	187	2	0.0106952	0.151273	209	0	0	1	620	13	0.0209677	0.150182	618	11	0.0177994	0.102909	341	4	0.0117302	0.139364
chr10	80728033	single	Intron 14 of ZMIZ1	10	81033027	81083027	370	0	0	1	244	0	0	1	272	8	0.0294118	0.0775455	546	2	0.003663	0.410545	536	0	0	1	403	0	0	1
chr11	110682429	110815769	*Not high density genotyped, POU2AF1, C11orf93	11	111218889	111268889	400	8	0.02	0.149273	171	0	0	1	225	1	0.00444444	0.237091	519	0	0	1	537	0	0	1	389	0	0	1
chr11	118080536	118085075	Intergenic region between TREH and DDX6	11	118552596	118602596	489	0	0	1	386	1	0.00259067	0.351091	344	2	0.00581395	0.203	630	0	0	1	586	0	0	1	528	0	0	1
chr11	127886184	127901948	5 kb 5' and the first exon of ETS1	11	128363856	128413856	294	2	0.00680272	0.338636	149	3	0.0201342	0.0988182	164	0	0	1	441	0	0	1	440	0	0	1	303	0	0	1
chr12	110368991	110494139	5' UTR and exons 1-3 of SH2B3, exons 2-25 and the 3' UTR of ATXN2	12	111871182	111921182	221	0	0	1	88	0	0	1	97	0	0	1	305	49	0.160656	0.00181818	324	56	0.17284	0.000454545	200	21	0.105	0.00863636
				12	111921182	111971182	199	0	0	1	115	0	0	1	91	0	0	1	320	39	0.121875	0.004	318	46	0.144654	0.000727273	226	23	0.10177	0.009
				12	111971182	112021182	243	2	0.00823045	0.303545	102	0	0	1	103	0	0	1	334	43	0.128743	0.00336364	337	50	0.148368	0.000545455	209	21	0.100478	0.00936364
chr14	68329159	68341722	1 kb 5' of and the first exon of ZFP36L1	14	69240688	69290688	353	1	0.00283286	0.482818	241	30	0.124481	0.0112727	233	0	0	1	498	2	0.00401606	0.398091	486	1	0.00205761	0.383818	382	0	0	1
chr15	72397784	73270664	*Not high density genotyped, CLK3, CSK and multiple other genes	15	75022171	75072171	324	1	0.00308642	0.469	214	0	0	1	232	8	0.0344828	0.0692727	443	0	0	1	462	11	0.0238095	0.0734545	362	7	0.019337	0.105818
chr16	10834038	10903351	*Not high density genotyped, CIITA	16	10961194	11011194	485	0	0	1	214	0	0	1	233	0	0	1	653	4	0.00612557	0.340909	639	12	0.0187793	0.0974545	393	28	0.0712468	0.0206364
chr16	11254549	11268703	11 kb 5' of, 1kb 3' of and all of SOCS1	16	11329125	11379125	470	9	0.0191489	0.154818	236	1	0.00423729	0.290818	288	1	0.00347222	0.279909	639	11	0.0172144	0.185091	638	0	0	1	440	23	0.0522727	0.0337273
chr16	11281298	single	Intergenic region between PRM1 and PRM2	16	11348797	11398797	530	9	0.0169811	0.175091	274	1	0.00364964	0.318273	306	1	0.00326797	0.287273	708	13	0.0183616	0.173273	703	0	0	1	477	24	0.0503145	0.0359091
chr16	11292457	single	10 kb 5' of PRM1	16	11359956	11409956	549	2	0.00364299	0.448545	287	1	0.00348432	0.325455	321	0	0	1	713	17	0.0238429	0.132	716	0	0	1	475	32	0.0673684	0.0218182
chr18	12811903	12870206	Exons 2-5 of PTPN2	18	12826055	12876055	438	0	0	1	202	1	0.0049505	0.256	248	0	0	1	576	0	0	1	573	9	0.0157068	0.118636	365	0	0	1
chr18	12847758	single	Intron 2 of PTPN2	18	12832758	12882758	452	0	0	1	215	1	0.00465116	0.269636	264	0	0	1	596	0	0	1	594	10	0.016835	0.110091	389	0	0	1
chr21	42728136	single	Intron 9 of UBASH3A	21	43830067	43880067	554	20	0.0361011	0.0675455	244	0	0	1	324	0	0	1	746	2	0.00268097	0.449455	749	3	0.00400534	0.300455	498	1	0.00200803	0.281091
chr21	44446245	44453549	18-25 kb 3' of ICOSLG	21	45600469	45650469	605	9	0.014876	0.197818	330	36	0.109091	0.0136364	376	0	0	1	749	7	0.00934579	0.276545	752	7	0.00930851	0.187273	536	0	0	1
chr22	20250903	20313260	UBE2L3, YDJC	22	21927081	21977081	364	1	0.00274725	0.489091	148	1	0.00675676	0.204636	175	0	0	1	494	0	0	1	511	21	0.0410959	0.0294545	318	0	0	1
					Totals		25770	464	0.0180054		13789	142	0.0102981		15816	41	0.00259231		36266	496	0.0136767		36161	427	0.0118083		25541	385	0.0150738
					Totals (no repeat SNPs)		22923	403	0.0175806		12129	138	0.0113777		13770	35	0.00254176		31819	470	0.014771		31782	399	0.0125543		22494	347	0.0154263
					0.1 > P > 0.05
					0.05 > P > 0.01
					P < 0.01
					Bold indicates > 1% of sites in region above 99% Fst threshold.
